# Supplementary material for: A Comparative Analysis of Drug-Induced Hepatotoxicity in Clinically Relevant Situations
Source: PubMed Central journal article supplement (PMC5289425; doi:10.1371/journal.pcbi.1005280), 2017-02-02

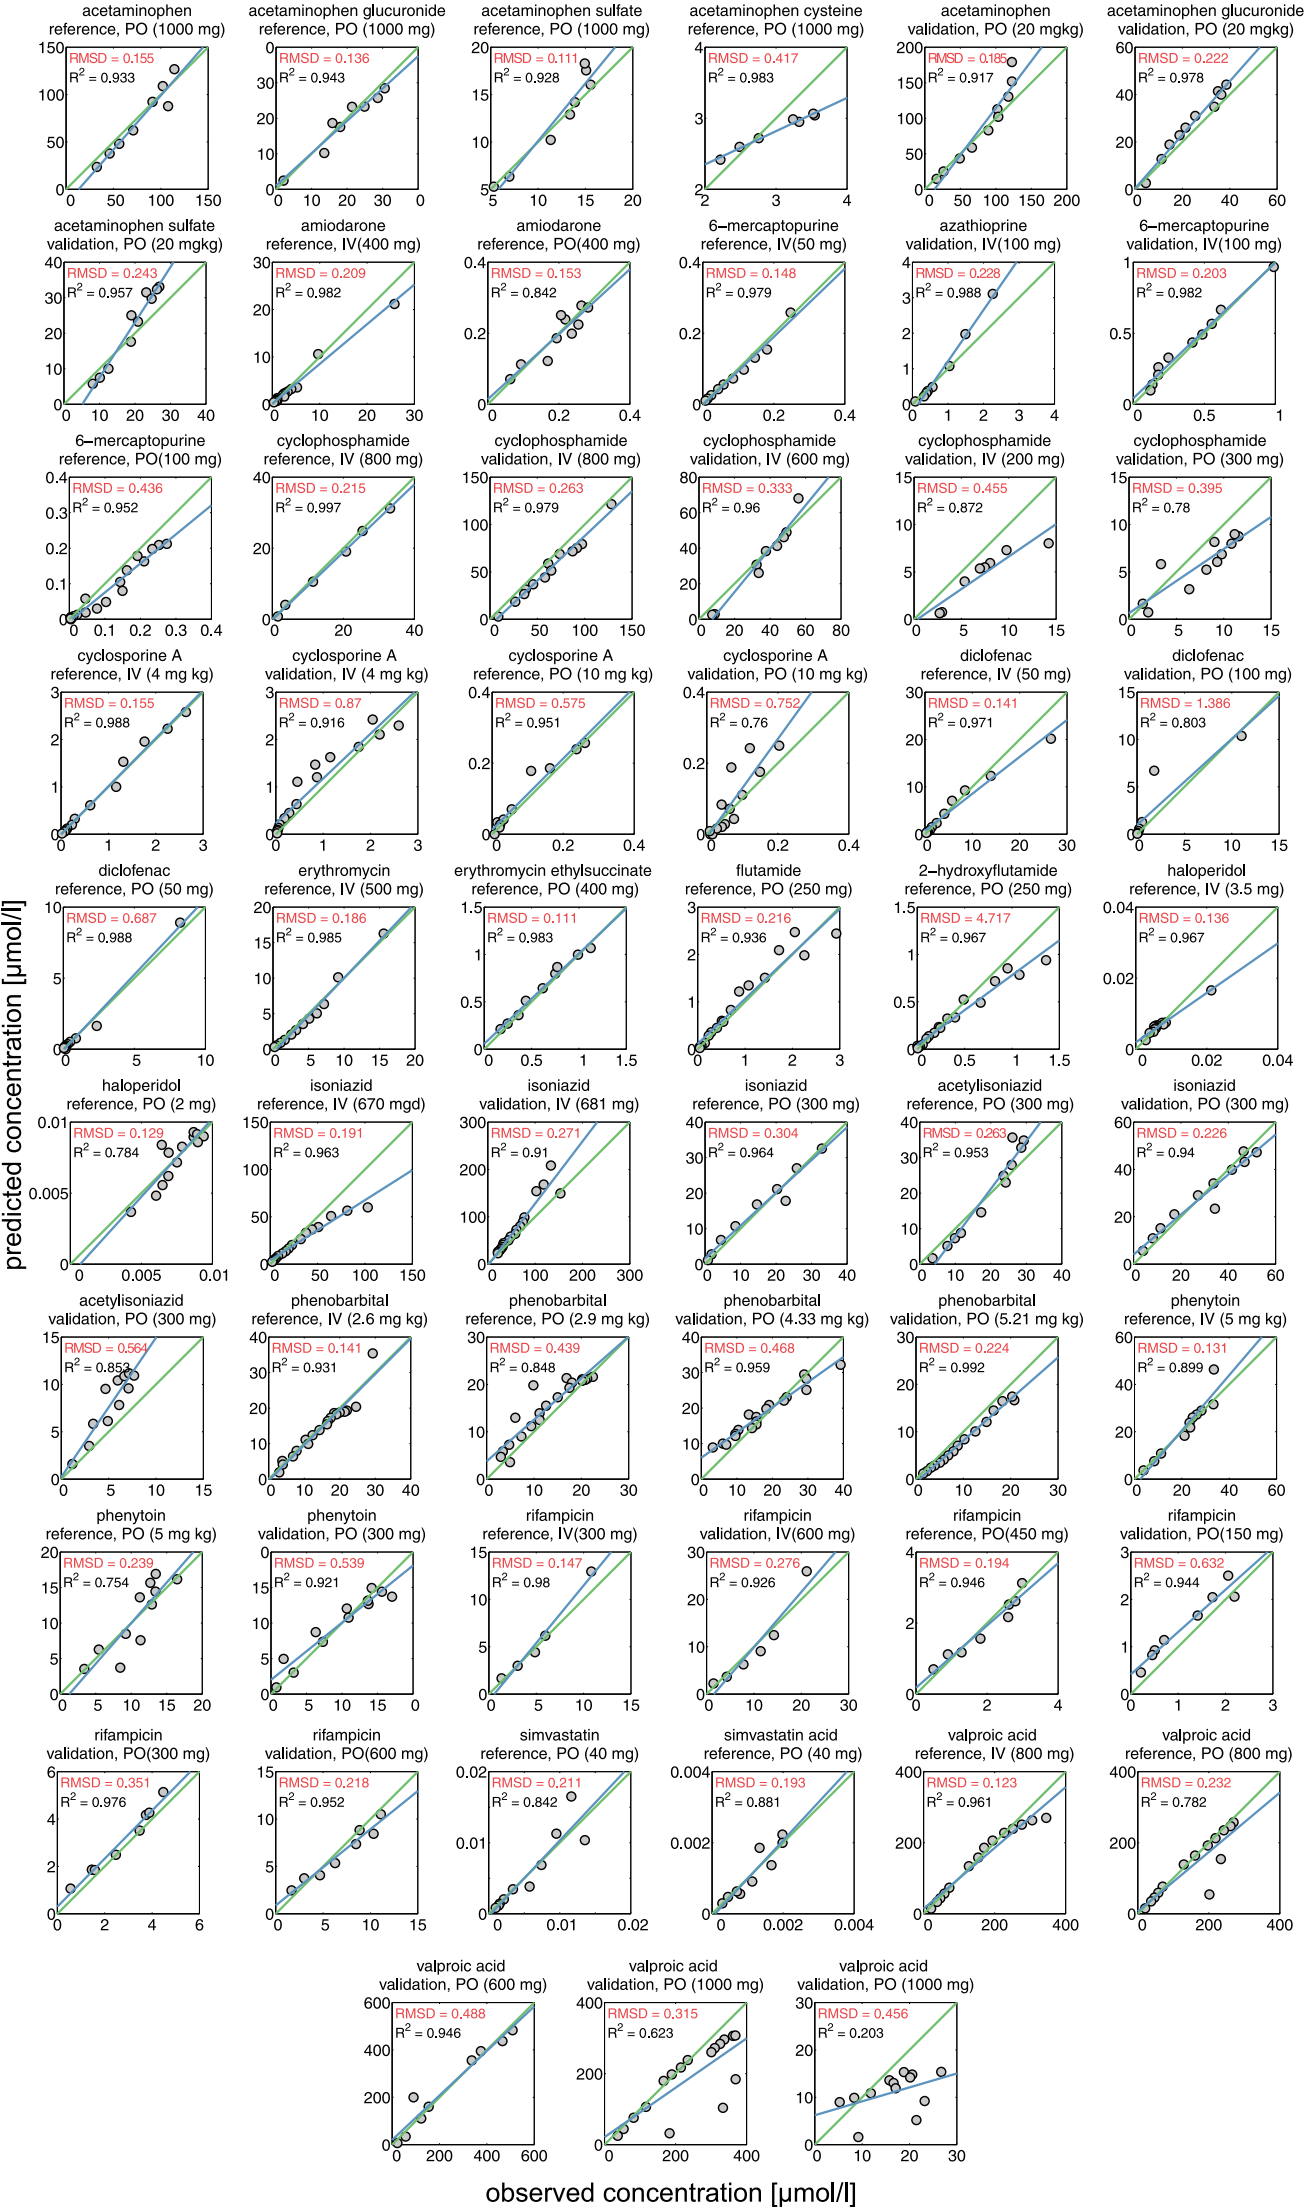

Supplement: pcbi.1005280.s001.pdf [file pcbi.1005280.s001.pdf]
