# Supplementary material for: A Comparative Analysis of Drug-Induced Hepatotoxicity in Clinically Relevant Situations
Source: PLoS Comput Biol. 2017 Feb 2;13(2):e1005280. doi: 10.1371/journal.pcbi.1005280 (PMC5289425; doi:10.1371/journal.pcbi.1005280)
Supplement: S4 Dataset — Drug-drug interactions predicted for the high-responsive drugs. (XLSX) [file pcbi.1005280.s017.xlsx]

## Sheet: Tabelle1
drug_a	drug_b	symbol	drug_a and drug_b are inducer/inhbitor/substrate of cytochrome P450 enzyme	reference	name	location	type	entrez_id	biomarker	tp	toxic change drug a	toxic change drug b	absolute difference of toxic changes	tox_lists
acetaminophen	valproic_acid	PPARGC1A	-		peroxisome proliferator-activated receptor gamma, coactivator 1 alpha	Nucleus	transcription regulator	10891	1	8h	1.35	1.01	0.35	pxr_rxr activation
acetaminophen	valproic_acid	SULT1E1	-		sulfotransferase family 1E, estrogen-preferring, member 1	Cytoplasm	enzyme	6783	1	24h	1.4	2.11	0.71	xenobiotic metabolism signaling|lps_il-1 mediated inhibition of rxr function
azathioprine	valproic_acid	PLK1	-		polo-like kinase 1	Nucleus	kinase	5347	1	24h	1.42	1.45	0.03	cell cycle g2_m dna damage checkpoint regulation
azathioprine	valproic_acid	CYP4X1	no	DrugBank	cytochrome P450, family 4, subfamily X, polypeptide 1	Cytoplasm	enzyme	260293	1	24h	1.05	1.79	0.74	fatty acid metabolism|xenobiotic metabolism signaling
cyclophosphamide	valproic_acid	CYP3A7	no	DrugBank	cytochrome P450, family 3, subfamily A, polypeptide 7	Cytoplasm	enzyme	1551	1	24h	2.12	3.74	1.62	cytochrome p450 - substrate is a xenobiotic|fatty acid metabolism|pxr_rxr activation|xenobiotic metabolism signaling|aryl hydrocarbon receptor signaling|lps_il-1 mediated inhibition of rxr function|nrf-2 mediated oxidative stress response
cyclophosphamide	rifampicin	CYP3A4	yes	DrugBank	cytochrome P450, family 3, subfamily A, polypeptide 4	Cytoplasm	enzyme	1576	1	24h	1.67	6.25	4.58	cytochrome p450 - substrate is a xenobiotic|pxr_rxr activation|xenobiotic metabolism signaling|aryl hydrocarbon receptor signaling|lps_il-1 mediated inhibition of rxr function|nrf-2 mediated oxidative stress response
cyclophosphamide	haloperidol	CYP3A4	yes	DrugBank	cytochrome P450, family 3, subfamily A, polypeptide 4	Cytoplasm	enzyme	1576	1	24h	1.67	2.11	0.44	cytochrome p450 - substrate is a xenobiotic|pxr_rxr activation|xenobiotic metabolism signaling|aryl hydrocarbon receptor signaling|lps_il-1 mediated inhibition of rxr function|nrf-2 mediated oxidative stress response
cyclophosphamide	valproic_acid	CYP3A4	yes	DrugBank	cytochrome P450, family 3, subfamily A, polypeptide 4	Cytoplasm	enzyme	1576	1	24h	1.67	4.42	2.75	cytochrome p450 - substrate is a xenobiotic|pxr_rxr activation|xenobiotic metabolism signaling|aryl hydrocarbon receptor signaling|lps_il-1 mediated inhibition of rxr function|nrf-2 mediated oxidative stress response
cyclophosphamide	rifampicin	CYP3A7	yes	DrugBank	cytochrome P450, family 3, subfamily A, polypeptide 7	Cytoplasm	enzyme	1551	1	24h	2.12	4.76	2.64	cytochrome p450 - substrate is a xenobiotic|fatty acid metabolism|pxr_rxr activation|xenobiotic metabolism signaling|aryl hydrocarbon receptor signaling|lps_il-1 mediated inhibition of rxr function|nrf-2 mediated oxidative stress response
cyclophosphamide	haloperidol	CYP3A7	yes	DrugBank	cytochrome P450, family 3, subfamily A, polypeptide 7	Cytoplasm	enzyme	1551	1	24h	2.12	2.11	0.02	cytochrome p450 - substrate is a xenobiotic|fatty acid metabolism|pxr_rxr activation|xenobiotic metabolism signaling|aryl hydrocarbon receptor signaling|lps_il-1 mediated inhibition of rxr function|nrf-2 mediated oxidative stress response
haloperidol	valproic_acid	CYP3A7	no	DrugBank	cytochrome P450, family 3, subfamily A, polypeptide 7	Cytoplasm	enzyme	1551	1	24h	2.11	3.74	1.63	cytochrome p450 - substrate is a xenobiotic|fatty acid metabolism|pxr_rxr activation|xenobiotic metabolism signaling|aryl hydrocarbon receptor signaling|lps_il-1 mediated inhibition of rxr function|nrf-2 mediated oxidative stress response
haloperidol	valproic_acid	CYP3A4	yes	DrugBank	cytochrome P450, family 3, subfamily A, polypeptide 4	Cytoplasm	enzyme	1576	1	24h	2.11	4.42	2.31	cytochrome p450 - substrate is a xenobiotic|pxr_rxr activation|xenobiotic metabolism signaling|aryl hydrocarbon receptor signaling|lps_il-1 mediated inhibition of rxr function|nrf-2 mediated oxidative stress response
isoniazid	acetaminophen	CYP1A1	no	DrugBank	cytochrome P450, family 1, subfamily A, polypeptide 1	Cytoplasm	enzyme	1543	1	8h	2.37	2.12	0.25	cytochrome p450 - substrate is a xenobiotic
isoniazid	valproic_acid	CYP1A1	no	DrugBank	cytochrome P450, family 1, subfamily A, polypeptide 1	Cytoplasm	enzyme	1543	1	24h	3.65	4.19	0.55	cytochrome p450 - substrate is a xenobiotic|fatty acid metabolism|xenobiotic metabolism signaling|aryl hydrocarbon receptor signaling|nrf-2 mediated oxidative stress response
isoniazid	valproic_acid	CYP1A2	yes	DrugBank	cytochrome P450, family 1, subfamily A, polypeptide 2	Cytoplasm	enzyme	1544	1	24h	2.05	2.5	0.46	cytochrome p450 - substrate is a xenobiotic|fatty acid metabolism|pxr_rxr activation|xenobiotic metabolism signaling|aryl hydrocarbon receptor signaling|nrf-2 mediated oxidative stress response
phenobarbital	rifampicin	ALAS1	-		5'-aminolevulinate synthase 1	Cytoplasm	enzyme	211	1	24h	1.24	1.54	0.3	pxr_rxr activation|lps_il-1 mediated inhibition of rxr function
phenobarbital	acetaminophen	SULT1E1	-		sulfotransferase family 1E, estrogen-preferring, member 1	Cytoplasm	enzyme	6783	1	24h	1.11	1.4	0.28	xenobiotic metabolism signaling|lps_il-1 mediated inhibition of rxr function
phenobarbital	valproic_acid	SULT1E1	-		sulfotransferase family 1E, estrogen-preferring, member 1	Cytoplasm	enzyme	6783	1	24h	1.11	2.11	0.99	xenobiotic metabolism signaling|lps_il-1 mediated inhibition of rxr function
phenobarbital	isoniazid	CYP1A1	no	DrugBank	cytochrome P450, family 1, subfamily A, polypeptide 1	Cytoplasm	enzyme	1543	1	8h	1.04	2.37	1.33	cytochrome p450 - substrate is a xenobiotic
phenobarbital	valproic_acid	CYP3A7	no	DrugBank	cytochrome P450, family 3, subfamily A, polypeptide 7	Cytoplasm	enzyme	1551	1	24h	5.4	3.74	1.66	cytochrome p450 - substrate is a xenobiotic|fatty acid metabolism|pxr_rxr activation|xenobiotic metabolism signaling|aryl hydrocarbon receptor signaling|lps_il-1 mediated inhibition of rxr function|nrf-2 mediated oxidative stress response
phenobarbital	azathioprine	CYP4X1	no	DrugBank	cytochrome P450, family 4, subfamily X, polypeptide 1	Cytoplasm	enzyme	260293	1	24h	1.36	1.05	0.32	fatty acid metabolism|xenobiotic metabolism signaling
phenobarbital	valproic_acid	CYP4X1	no	DrugBank	cytochrome P450, family 4, subfamily X, polypeptide 1	Cytoplasm	enzyme	260293	1	24h	1.36	1.79	0.43	fatty acid metabolism|xenobiotic metabolism signaling
phenobarbital	acetaminophen	CYP1A1	yes	DrugBank	cytochrome P450, family 1, subfamily A, polypeptide 1	Cytoplasm	enzyme	1543	1	8h	1.04	2.12	1.08	cytochrome p450 - substrate is a xenobiotic
phenobarbital	rifampicin	CYP2B6	yes	DrugBank	cytochrome P450, family 2, subfamily B, polypeptide 6	Cytoplasm	enzyme	1555	1	24h	1.18	2	0.82	cytochrome p450 - substrate is a xenobiotic|fatty acid metabolism|pxr_rxr activation|xenobiotic metabolism signaling|lps_il-1 mediated inhibition of rxr function|car_rxr activation|glutathione depletion - hepatocellular hypertrophy|nrf-2 mediated oxidative stress response
phenobarbital	valproic_acid	CYP2B6	yes	DrugBank	cytochrome P450, family 2, subfamily B, polypeptide 6	Cytoplasm	enzyme	1555	1	24h	1.18	1.48	0.3	cytochrome p450 - substrate is a xenobiotic|fatty acid metabolism|pxr_rxr activation|xenobiotic metabolism signaling|lps_il-1 mediated inhibition of rxr function|car_rxr activation|glutathione depletion - hepatocellular hypertrophy|nrf-2 mediated oxidative stress response
phenobarbital	rifampicin	CYP2C8	yes	DrugBank	cytochrome P450, family 2, subfamily C, polypeptide 8	Cytoplasm	enzyme	1558	1	24h	1.74	1.62	0.12	cytochrome p450 - substrate is a xenobiotic|fatty acid metabolism|pxr_rxr activation|xenobiotic metabolism signaling|aryl hydrocarbon receptor signaling|lps_il-1 mediated inhibition of rxr function|car_rxr activation|nrf-2 mediated oxidative stress response
phenobarbital	cyclophosphamide	CYP3A4	yes	DrugBank	cytochrome P450, family 3, subfamily A, polypeptide 4	Cytoplasm	enzyme	1576	1	24h	6.11	1.67	4.44	cytochrome p450 - substrate is a xenobiotic|pxr_rxr activation|xenobiotic metabolism signaling|aryl hydrocarbon receptor signaling|lps_il-1 mediated inhibition of rxr function|nrf-2 mediated oxidative stress response
phenobarbital	rifampicin	CYP3A4	yes	DrugBank	cytochrome P450, family 3, subfamily A, polypeptide 4	Cytoplasm	enzyme	1576	1	24h	6.11	6.25	0.14	cytochrome p450 - substrate is a xenobiotic|pxr_rxr activation|xenobiotic metabolism signaling|aryl hydrocarbon receptor signaling|lps_il-1 mediated inhibition of rxr function|nrf-2 mediated oxidative stress response
phenobarbital	haloperidol	CYP3A4	yes	DrugBank	cytochrome P450, family 3, subfamily A, polypeptide 4	Cytoplasm	enzyme	1576	1	24h	6.11	2.11	4	cytochrome p450 - substrate is a xenobiotic|pxr_rxr activation|xenobiotic metabolism signaling|aryl hydrocarbon receptor signaling|lps_il-1 mediated inhibition of rxr function|nrf-2 mediated oxidative stress response
phenobarbital	valproic_acid	CYP3A4	yes	DrugBank	cytochrome P450, family 3, subfamily A, polypeptide 4	Cytoplasm	enzyme	1576	1	24h	6.11	4.42	1.69	cytochrome p450 - substrate is a xenobiotic|pxr_rxr activation|xenobiotic metabolism signaling|aryl hydrocarbon receptor signaling|lps_il-1 mediated inhibition of rxr function|nrf-2 mediated oxidative stress response
phenobarbital	rifampicin	CYP3A5	yes	DrugBank	cytochrome P450, family 3, subfamily A, polypeptide 5	Cytoplasm	enzyme	1577	1	24h	1.73	1.78	0.06	cytochrome p450 - substrate is a xenobiotic|fatty acid metabolism|pxr_rxr activation|xenobiotic metabolism signaling|aryl hydrocarbon receptor signaling|lps_il-1 mediated inhibition of rxr function|nrf-2 mediated oxidative stress response
phenobarbital	rifampicin	CYP3A5	yes	DrugBank	cytochrome P450, family 3, subfamily A, polypeptide 5	Cytoplasm	enzyme	1577	1	8h	1.4	1.52	0.13	cytochrome p450 - substrate is a xenobiotic|pxr_rxr activation
phenobarbital	cyclophosphamide	CYP3A7	yes	DrugBank	cytochrome P450, family 3, subfamily A, polypeptide 7	Cytoplasm	enzyme	1551	1	24h	5.4	2.12	3.28	cytochrome p450 - substrate is a xenobiotic|fatty acid metabolism|pxr_rxr activation|xenobiotic metabolism signaling|aryl hydrocarbon receptor signaling|lps_il-1 mediated inhibition of rxr function|nrf-2 mediated oxidative stress response
phenobarbital	rifampicin	CYP3A7	yes	DrugBank	cytochrome P450, family 3, subfamily A, polypeptide 7	Cytoplasm	enzyme	1551	1	8h	1.58	2.11	0.53	cytochrome p450 - substrate is a xenobiotic|pxr_rxr activation
phenobarbital	rifampicin	CYP3A7	yes	DrugBank	cytochrome P450, family 3, subfamily A, polypeptide 7	Cytoplasm	enzyme	1551	1	24h	5.4	4.76	0.64	cytochrome p450 - substrate is a xenobiotic|fatty acid metabolism|pxr_rxr activation|xenobiotic metabolism signaling|aryl hydrocarbon receptor signaling|lps_il-1 mediated inhibition of rxr function|nrf-2 mediated oxidative stress response
phenobarbital	haloperidol	CYP3A7	yes	DrugBank	cytochrome P450, family 3, subfamily A, polypeptide 7	Cytoplasm	enzyme	1551	1	24h	5.4	2.11	3.29	cytochrome p450 - substrate is a xenobiotic|fatty acid metabolism|pxr_rxr activation|xenobiotic metabolism signaling|aryl hydrocarbon receptor signaling|lps_il-1 mediated inhibition of rxr function|nrf-2 mediated oxidative stress response
rifampicin	valproic_acid	AKR1D1	-		cytochrome P450, family 3, subfamily A, polypeptide 4	Cytoplasm	enzyme	1576	1	24h	6.25	4.42	1.85	cytochrome p450 - substrate is a xenobiotic|pxr_rxr activation|xenobiotic metabolism signaling|aryl hydrocarbon receptor signaling|lps_il-1 mediated inhibition of rxr function|nrf-2 mediated oxidative stress response
rifampicin	valproic_acid	CYP3A7	no	DrugBank	cytochrome P450, family 3, subfamily A, polypeptide 7	Cytoplasm	enzyme	1551	1	24h	4.76	3.74	1.02	cytochrome p450 - substrate is a xenobiotic|fatty acid metabolism|pxr_rxr activation|xenobiotic metabolism signaling|aryl hydrocarbon receptor signaling|lps_il-1 mediated inhibition of rxr function|nrf-2 mediated oxidative stress response
rifampicin	valproic_acid	CYP2B6	yes	DrugBank	cytochrome P450, family 2, subfamily B, polypeptide 6	Cytoplasm	enzyme	1555	1	24h	2	1.48	0.52	cytochrome p450 - substrate is a xenobiotic|fatty acid metabolism|pxr_rxr activation|xenobiotic metabolism signaling|lps_il-1 mediated inhibition of rxr function|car_rxr activation|glutathione depletion - hepatocellular hypertrophy|nrf-2 mediated oxidative stress response
rifampicin	haloperidol	CYP3A4	yes	DrugBank	cytochrome P450, family 3, subfamily A, polypeptide 4	Cytoplasm	enzyme	1576	1	24h	6.25	2.11	4.14	cytochrome p450 - substrate is a xenobiotic|pxr_rxr activation|xenobiotic metabolism signaling|aryl hydrocarbon receptor signaling|lps_il-1 mediated inhibition of rxr function|nrf-2 mediated oxidative stress response
rifampicin	valproic_acid	CYP3A4	yes	DrugBank	aldo-keto reductase family 1, member D1	Cytoplasm	enzyme	6718	1	24h	1.35	3.2	1.83	fatty acid metabolism
rifampicin	haloperidol	CYP3A7	yes	DrugBank	cytochrome P450, family 3, subfamily A, polypeptide 7	Cytoplasm	enzyme	1551	1	24h	4.76	2.11	2.66	cytochrome p450 - substrate is a xenobiotic|fatty acid metabolism|pxr_rxr activation|xenobiotic metabolism signaling|aryl hydrocarbon receptor signaling|lps_il-1 mediated inhibition of rxr function|nrf-2 mediated oxidative stress response
